# Supplementary material
Source: PubMed Central journal article supplement (PMC7825191)
Supplement: PSP4-10-18-s007.pdf [file PSP4-10-18-s007.pdf]

# Model Equations

## 1 Virus ( $V$ )

$$\frac{dV}{dT} = \alpha_v \cdot I - f_{Vint} k_{int}(AT2) \cdot V \cdot \left( 1 - k_{int\_IFN\beta} \frac{(IFN\beta)}{km_{int\_IFN\beta} + (IFN\beta)} \right) - k_{V\_phago} \cdot V \cdot (DC + M1) - \beta_V \cdot V$$

The virus infects healthy type II alveolar cells ( $AT2$ ) and is productively shed by these infected cells  $I$ . Type I Interferon ( $IFN\beta$ ) inhibits the formation of infected cells through an indirect response model. The virus is also phagocytosed by dendritic cells ( $DC$ ) and macrophages ( $M1$ ) and undergoes non-specific clearance at a rate  $\beta_V$ .

## 2 Healthy Alveolar Type 2 Cell ( $AT2$ )

$$\frac{dAT2}{dT} = \mu_{AT2}(AT2) - k_{int}(AT2) \cdot V \cdot \left( 1 - k_{int[IFN\beta]} \frac{(IFN\beta)}{km_{int\_IFN\beta} + (IFN\beta)} \right) - \beta_{AT2}(AT2) - k_{ROS\_damage}(AT2) - k_{cyt\_damage}(AT2)$$

$$\mu_{AT2} = \mu_{basal[AT2]} \left( 1 + k_\mu \frac{\delta AT}{km_\mu + \delta AT} \right)$$

$$\delta AT2 = AT1_{basal} + AT2_{basal} - (AT1 + AT2)$$

$$k_{cyt\_damage} = k_{damage} \left[ \left( \frac{k_{damage\_TNF}(TNF)}{km_{damage\_TNF} + (TNF)} \right) + \frac{k_{damage\_IL6}(IL6)}{km_{damage\_IL6} + (IL6)} + \frac{k_{damage\_IL1\beta}(IL1\beta)}{km_{damage\_IL1\beta} + (IL1\beta)} + \frac{k_{damage\_IFN\gamma}(IFN\gamma)}{km_{damage\_IFN\gamma} + (IFN\gamma)} \right]$$

$$k_{ROS\_damage} = k_{ROS\_N} \left( \frac{N}{km_{ROS\_N} + N} \right)$$

( $AT2$ ) cells are depleted due to infection by virus, apoptotic damage by ( $ROS$ ) secreted by neutrophils ( $N$ ) and damage due to proinflammatory cytokines at a rate  $k_{cyt\_damage}$ . ( $AT2$ ) cells are additionally formed at a rate  $\mu_{AT2}$  that is dependent on the extent of ( $AT2$ ) depletion and cleared with a death rate of  $\beta_{AT2}$ .

## 3 Infected Alveolar Type 2 Cells ( $I$ )

$$\frac{dI}{dT} = k_{int}(AT2) \cdot V \cdot \left( 1 - k_{int(IFN\beta)} \frac{(IFN\beta)}{km_{int\_IFN\beta} + (IFN\beta)} \right) - \beta_I \cdot I - k_{kill} \left( 1 + \frac{(IFN\beta)}{km_{kill} + (IFN\beta)} \right) \cdot I \cdot (CTL) - k_{I\_phago} \cdot I \cdot (DC + M1) - k_{ROS\_damage} \cdot I$$

Infected cells, ( $I$ ) are formed by infection of ( $AT2$ ) cells and non-specifically cleared at a rate  $\beta_I$ . Additionally, they are apoptotically cleared by cytotoxic T cells ( $CTL$ ) and ( $ROS$ ), and phagocytosed by ( $DC$ ) and ( $M1$ ).

## 4 Healthy Alveolar Type 1 Cells ( $AT1$ )

$$\frac{dAT1}{dt} = k_{diff\_AT2\_AT1}(AT2) - \beta_{AT1}(AT1) - k_{ROS\_damage}(AT1) - k_{cyt\_damage}(AT1)$$

$$k_{diff\_AT2\_AT1} = k_{basal\_diff\_AT2\_AT1} \left(1 + k_{\mu} \frac{\delta AT}{km_{\mu} + \delta AT}\right)$$

$$\delta AT = AT1_{basal} + AT2_{basal} - (AT1 + AT2)$$

( $AT1$ ) are resistant to infection but can undergo inflammatory cell death mediated by ( $ROS$ ) and proinflammatory cytokines ( $k_{cyt\_damage}$ ). Additionally, they are formed from differentiation ( $AT2$ ) cells and undergo non-specific clearance at a rate  $\beta_{AT1}$ .

## 5 Damaged Alveolar Type 1 Cells ( $DAT1$ )

$$\frac{dDAT1}{dt} = k_{ROS\_damage}(AT1) + k_{cyt\_damage}(AT1) - \beta_{dAT1}(DAT1)$$

$DAT1$  are formed by  $ROS$ -mediated and cytokine-mediated damage ( $k_{cyt\_damage}$ ) of  $AT1$  cells.

## 6 Damaged Alveolar Type 2 Cells ( $DAT2$ )

$$\frac{d(DAT2)}{dt} = k_{ROS\_damage}(I + AT2) + k_{cyt\_damage}(AT2) - \beta_{dAT2}(DAT2)$$

( $DAT2$ ) are formed by cytokine-mediated damage ( $k_{cyt\_damage}$ ) of ( $AT2$ ) cells and  $ROS$ -mediated damage of ( $AT2$ ) and ( $I$ ).

## 7 Dendritic Cell Maturation ( $DC$ )

$$\begin{aligned} \frac{dDC}{dt} = \alpha_{DC} & \left[ \frac{k_V \cdot V}{K_V + V} + \frac{k_I \cdot I}{K_I + I} + \frac{k_D(DAT1 + DAT2)}{K_D + (DAT1 + DAT2)} \right] \left[ k_{DC(TNF)} \cdot \left( \frac{(TNF\alpha)}{K_{DC(TNF)} + (TNF\alpha)} \right) + \right. \\ & \left. k_{DC(IFN\gamma)} \cdot \left( \frac{(IFN\gamma)}{K_{DC(IFN\gamma)} + (IFN\gamma)} \right) + k_{DC(GM-CSF)} \cdot \left( \frac{(GM-CSF)}{K_{DC(GM-CSF)} + (GM-CSF)} \right) \right] \\ & \left[ \frac{K_{DC(IL10)}}{K_{DC(IL10)} + (IL10)} \right] - \beta_{DC} \cdot (DC) \end{aligned}$$

Mature ( $DC$ ) are formed upon recognition of viral particles ( $V$ ), infected cells ( $I$ ), and damaged ( $AT1$ ) and ( $AT2$ ) cells. ( $DC$ ) maturation is further induced by ( $TNF\alpha$ ), ( $IFN\gamma$ ), ( $GM-CSF$ ), and inhibited by ( $IL10$ ). Mature ( $DC$ ) undergo nonspecific clearance at a rate  $\beta_{DC}$ .

## 8 Macrophage Activation ( $M1$ )

$$\begin{aligned} \frac{dM1}{dt} = \alpha_{M1} \left[ \left( \frac{k_V \cdot V}{K_V + V} + \frac{k_I \cdot I}{K_I + I} + \frac{k_D(DAT1 + DAT2)}{K_D + (DAT1 + DAT2)} \right) \right] & \left[ k_{M1(TNF\alpha)} \cdot \left( \frac{(TNF\alpha)}{K_{M1(TNF\alpha)} + (TNF\alpha)} \right) + \right. \\ & \left. k_{M1(IFN\gamma)} \cdot \left( \frac{(IFN\gamma)}{K_{DC(IFN\gamma)} + (IFN\gamma)} \right) + k_{M1(GM-CSF)} \cdot \left( \frac{(GM-CSF)}{K_{M1(GM-CSF)} + (GM-CSF)} \right) \right] \\ & \left[ \frac{K_{M1(IL10)}}{K_{M1(IL10)} + (IL10)} \right] - \beta_{M1} \cdot (M1) \end{aligned}$$

Activated ( $M1$ ) are formed upon recognition of viral particles ( $V$ ), infected cells ( $I$ ), and damaged ( $AT1$ ) and ( $AT2$ ) cells. ( $M1$ ) activation is induced by ( $TNF\alpha$ ), ( $IFN\gamma$ ), ( $GM-CSF$ ), and inhibited by ( $IL10$ ). Activated ( $M1$ ) undergo nonspecific clearance at a rate  $\beta_{M1}$ .

## 9 Neutrophil Activation ( $N$ )

$$\begin{aligned} \frac{dN}{dt} = \alpha_N \left[ \left( \frac{k_V \cdot V}{K_V + V} + \frac{k_I \cdot I}{K_I + I} + \frac{k_D(DAT1 + DAT2)}{K_D + (DAT1 + DAT2)} \right) \right] & \left[ k_{M1(TNF\alpha)} \cdot \left( \frac{(TNF\alpha)}{K_{M1(TNF\alpha)} + (TNF\alpha)} \right) + \right. \\ & \left. k_{M1(IFN\gamma)} \cdot \left( \frac{(IFN\gamma)}{K_{DC(IFN\gamma)} + (IFN\gamma)} \right) + k_{M1(GM-CSF)} \cdot \left( \frac{(GM-CSF)}{K_{M1(GM-CSF)} + (GM-CSF)} \right) \right] \\ & k_{tr_N} \cdot N_c \cdot \left( \frac{(IL17)}{k_{m_{N\_IL17}} + (IL17)} \right) - \beta_N \cdot N - k_{tr(N)} \cdot N \end{aligned}$$

Activated ( $N$ ) are formed upon recognition of viral particles ( $V$ ), infected cells ( $I$ ), and damaged ( $AT1$ ) and ( $AT2$ ) cells. ( $N$ ) activation is induced by ( $TNF\alpha$ ), ( $IFN\gamma$ ), ( $GM-CSF$ ), and inhibited by ( $IL10$ ). Activated ( $N$ ) undergo nonspecific clearance at a rate  $\beta_N$ . Activated ( $N$ ) migration is also induced by ( $IL17$ ).

## 10 T-helper 1 ( $Th1$ ) Cell Activation ( $Th1$ )

$$\begin{aligned} \frac{dTh1}{dt} = \alpha_{Th1} [DC] \left[ k_{Th1(IL12)} \left( \frac{(IL12)}{K_{Th1(IL12)} + (IL12)} \right) \right. \\ \left. \left( 1 + k_{Th1(IL12/IL2)} \left( \frac{(IL2)}{K_{Th1(IL12/IL2)} + (IL2)} \right) \right) \left( \frac{K_{Th1(IL10)}}{K_{Th1(IL10)} + (IL10)} \right) \left( \frac{K_{Th1(TGF\beta)}}{K_{Th1(TGF\beta)} + (TGF\beta)} \right) + \right. \\ \left. k_{Th1(IFN\gamma)} \left( \frac{(IFN\gamma)}{K_{Th1(IFN\gamma)} + (IFN\gamma)} \right) \left( \frac{K_{Th1(IL10)}}{K_{Th1(IL10)} + (IL10)} \right) \left( \frac{K_{Th1(TGF\beta)}}{K_{Th1(TGF\beta)} + (TGF\beta)} \right) \left( \frac{K_{Th1(IL6)}}{K_{Th1(IL6)} + (IL6)} \right) \right] + \\ k_{Th1(Th17)} \cdot (Th17) \cdot \left( \frac{(IL12)}{K_{Th1(Th17)} + (IL12)} \right) \left( \frac{K_{Th1(TGF\beta)}}{K_{Th1(TGF\beta)} + (TGF\beta)} \right) + \\ k_{Th1(Treg)} \cdot (Treg) \cdot \left( \frac{(IL12)}{K_{Th1(Treg)} + (IL12)} \right) - \beta_{Th1} \cdot (Th1) + k_{tr(Th1)} \cdot (Th1) \end{aligned}$$

The production of ( $Th1$ ) is activated by viral epitope-responsive mature ( $DC$ ), and further induced by ( $IL12$ ), ( $IL2$ ), ( $IFN\gamma$ ), ( $IFN\beta$ ) and inhibited by ( $IL10$ ) and ( $TGF\beta$ ). Additionally, the ability of ( $IFN\gamma$ ) and ( $IL6$ ) to negatively regulate each other's activity is also incorporated. The clearance rate of ( $Th1$ ) is determined by a nonspecific death/deactivation rate  $\beta_{Th1}$ , and inter-compartmental transport rate  $k_{tr(Th1)}$ .

## 11 T-helper 17 (Th17) Cell Activation (*Th17*)

$$\begin{aligned} \frac{dTh17}{dt} = \alpha_{Th17}(DC) \left[ \right. & \\ k_{Th17(TGF\beta)} \cdot \left( \frac{(TGF\beta)}{K_{Th17(TGF\beta)} + (TGF\beta)} \right) \left( \frac{K_{Th17(IL10)}}{K_{Th17(IL10)} + (IL10)} \right) \left( \frac{K_{Th17(IFN\gamma)}}{K_{Th17(IFN\gamma)} + (IFN\gamma)} \right) \left( \frac{K_{Th17(IL2)}}{K_{Th17(IL2)} + (IL2)} \right) + & \\ k_{Th17(IL6)} \left( \frac{(IL6)}{K_{Th17(IL6)} + (IL6)} \right) \left( \frac{K_{Th17(IL10)}}{K_{Th17(IL10)} + (IL10)} \right) \left( \frac{K_{Th17(IFN\gamma)}}{K_{Th17(IFN\gamma)} + (IFN\gamma)} \right) \left( \frac{K_{Th17(IL2)}}{K_{Th17(IL2)} + (IL2)} \right) + & \\ k_{Th17(IL1\beta)} \left( \frac{(IL1\beta)}{K_{Th17(IL1\beta)} + (IL1\beta)} \right) \left( \frac{K_{Th17(IL10)}}{K_{Th17(IL10)} + (IL10)} \right) \left( \frac{K_{Th17(IFN\gamma)}}{K_{Th17(IFN\gamma)} + (IFN\gamma)} \right) \left( \frac{K_{Th17(IL2)}}{K_{Th17(IL2)} + (IL2)} \right) \left. \right] - & \\ k_{Th1(Th17)} \cdot (Th17) \cdot \left( \frac{(IL12)}{K_{Th1(Th17)} + (IL12)} \right) \left( \frac{K_{Th1(TGF\beta)}}{K_{Th1(TGF\beta)} + (TGF\beta)} \right) - \beta_{Th17} \cdot (Th17) - k_{tr(Th17)} \cdot (Th17) & \end{aligned}$$

The production of (*Th17*) is activated by viral epitope-responsive mature (*DC*), and further induced by (*TGFβ*), (*IL6*), (*IL1β*) and inhibited by (*IL10*) and (*IFNγ*). Additionally, the ability of (*IFNγ*) and (*IL6*) to negatively regulate each other's activity is also incorporated. (*Th17*) cells can also undergo (*IL12*)-mediated differentiation to (*Th1*) cells. The clearance rate of (*Th17*) is determined by a nonspecific death/deactivation rate  $\beta_{Th17}$ , and inter-compartmental transport rate  $k_{tr(Th17)}$ .

## 12 Cytotoxic T Cell Activation (*CTL*)

$$\begin{aligned} \frac{dCTL}{dt} = \alpha_{CTL} [DC] \left[ 1 + \frac{k_{MHCI(IFN\beta)}(IFN\beta)}{km_{MHCI(IFN\beta)} + (IFN\beta)} \right] \left[ 1 + k_{CTL(IL12)} \left( \frac{(IL12)}{K_{CTL(IL12)} + (IL12)} \right) \right. & \\ \left. \left( 1 + k_{CTL(IL12/IL2)} \left( \frac{(IL2)}{K_{CTL(IL12/IL2)} + (IL2)} \right) \right) \right] + & \\ k_{CTL(IFN\gamma)} \left( \frac{(IFN\gamma)}{K_{CTL(IFN\gamma)} + (IFN\gamma)} \right) \left( \frac{K_{CTL(IL6)}}{K_{CTL(IL6)} + (IL6)} \right) \left[ \left( \frac{K_{CTL(IL10)}}{K_{CTL(IL10)} + (IL10)} \right) \left( \frac{K_{CTL(TGF\beta)}}{K_{CTL(TGF\beta)} + (TGF\beta)} \right) \right. & \\ \left. - \beta_{CTL}(CTL) - k_{tr(CTL)}(CTL) \right] & \end{aligned}$$

The production of (*CTL*) is activated by viral epitope-responsive mature (*DC*), and further induced by (*IL12*), (*IL2*), (*IFNγ*), (*IFNβ*) and inhibited by (*IL10*) and (*TGFβ*). Additionally, the ability of (*IFNγ*) and (*IL6*) to negatively regulate each other's activity is also incorporated. The clearance rate of (*CTL*) is determined by a nonspecific death/deactivation rate  $\beta_{CTL}$ , and inter-compartmental transport rate  $k_{tr(CTL)}$ .

## 13 T regulatory (Treg) Cell Activation (*Treg*)

$$\begin{aligned} \frac{dTreg}{dt} = \alpha_{Treg}(DC) \left[ k_{Treg(IL2)} \left( \frac{(IL2)}{K_{Treg(IL2)} + (IL2)} \right) \left( \frac{K_{Treg(IL17)}}{K_{Treg(IL17)} + (IL17)} \right) \left( \frac{K_{Treg(IL6)}}{K_{Treg(IL6)} + (IL6)} \right) + \right. & \\ k_{Treg(TGF\beta)} \left( \frac{(TGF\beta)}{K_{Treg(TGF\beta)} + (TGF\beta)} \right) \left( \frac{K_{Treg(IL17)}}{K_{Treg(IL17)} + (IL17)} \right) \left( \frac{K_{Treg(IL6)}}{K_{Treg(IL6)} + (IL6)} \right) \left. \right] & \\ - k_{Th1(Treg)} \cdot (Treg) \cdot \left( \frac{(IL12)}{K_{Th1(Treg)} + (IL12)} \right) - \beta_{Treg}(Treg) - k_{tr(Treg)}(Treg) & \end{aligned}$$

The production of (*Treg*) is activated by viral epitope-responsive mature (*DC*), and further induced by (*TGFβ*) and (*IL2*) and inhibited by (*IL17*) and (*IL6*). (*Treg*) cells can also undergo (*IL12*)-mediated differentiation to (*Th1*) cells. The clearance rate of (*Treg*) is determined by a nonspecific death/deactivation rate  $\beta_{Treg}$ , and inter-compartmental transport rate  $k_{tr(Treg)}$ .

## 14 Tumor necrosis factor $\alpha$ (*TNFα*)

$$\frac{dTNF\alpha}{dt} = \alpha_{TNF} \cdot \left[ \alpha_{TNF(basal)} + \alpha_{TNF(DAT1)}(DAT1) + \alpha_{TNF(I)} \cdot I + \alpha_{TNF(DAT2)}(DAT2) \right. \\ \left. + \alpha_{TNF(M1)}(M1) + \alpha_{TNF(Th1)}(Th1) + \alpha_{TNF(Th17)}(Th17) \right] - \beta_{TNF}(TNF\alpha) - k_{tr(TNF\alpha)}(TNF\alpha)$$

(*TNFα*) is secreted by (*DAT1*), (*DAT2*), (*I*), (*M1*), (*Th1*) and (*Th17*). (*TNFα*) additionally has a basal non-specific production rate  $\alpha_{TNF} \cdot \alpha_{TNF(basal)}$ , a clearance rate  $\beta_{TNF}$  and inter-compartmental transport rate  $k_{tr(TNF\alpha)}$ .

## 15 Interleukin-6 (IL-6) (*IL6*)

$$\frac{dIL6}{dt} = \alpha_{IL6} \left[ \alpha_{IL6(basal)} + \alpha_{IL6(DAT1)}(DAT1) + \alpha_{IL6(I)} \cdot I + \alpha_{IL6(DAT2)}(DAT2) + \alpha_{IL6(M1)}(M1) + \right. \\ \left. + \alpha_{IL6(Th17)}(Th17) + \alpha_{IL6(Neu)}(N) + \alpha_{IL6(I)} \cdot I \right] - \beta_{IL6}(IL6) - k_{tr(IL6)}(IL6)$$

(*IL6*) is secreted by (*DAT1*), (*DAT2*), (*I*), (*M1*), (*N*) and (*Th17*). (*IL6*) additionally has a basal non-specific production rate  $\alpha_{IL6} \cdot \alpha_{IL6(basal)}$ , a clearance rate  $\beta_{IL6}$  and inter-compartmental transport rate  $k_{tr(IL6)}$ .

## 16 Interleukin-1β (IL-1β) (*IL1β*)

$$\frac{dIL1\beta}{dt} = \alpha_{IL1\beta} \left[ \alpha_{IL1\beta(basal)} + \alpha_{IL1\beta(DAT1)}(DAT1) + \alpha_{IL1\beta(I)} \cdot I + \alpha_{IL1\beta(DAT2)}(DAT2) \right. \\ \left. + \alpha_{IL1\beta(M1)}(M1) + \alpha_{IL1\beta(DC)}(DC) + \alpha_{IL1\beta(I)} \cdot I \right] - \beta_{IL1\beta}(IL1\beta) - k_{tr(IL1\beta)}(IL1\beta)$$

(*IL1β*) is secreted by (*DAT1*), (*DAT2*), (*I*), (*M1*) and (*DC*). (*IL1β*) additionally has a basal non-specific production rate  $\alpha_{IL1\beta} \cdot \alpha_{IL1\beta(basal)}$ , a clearance rate  $\beta_{IL1\beta}$  and inter-compartmental transport rate  $k_{tr(IL1\beta)}$ .

## 17 Interferon $\gamma$ (IFN $\gamma$ ) (*IFNγ*)

$$\frac{dIFN\gamma}{dt} = \alpha_{IFN\gamma} \left[ \alpha_{IFN\gamma(basal)} + \alpha_{IFN\gamma(DC)}(DC) + \alpha_{IFN\gamma(Th1)}(Th1) + \alpha_{IFN\gamma(CTL)}(CTL) \right] - \beta_{IFN\gamma}(IFN\gamma) - k_{tr(IFN\gamma)}(IFN\gamma)$$

(*IFNγ*) is secreted by (*Th1*), (*CTL*) and (*DC*). (*IFNγ*) additionally has a basal non-specific production rate  $\alpha_{IFN\gamma} \cdot \alpha_{IFN\gamma(basal)}$ , a clearance rate  $\beta_{IFN\gamma}$  and inter-compartmental transport rate  $k_{tr(IFN\gamma)}$ .

## 18 Type I Interferons ( $IFN\beta$ )

$$\frac{dIFN\beta}{dt} = \alpha_{IFN\beta} \left[ \alpha_{IFN\beta(basal)} + \alpha_{IFN\beta(I)} \cdot I + \alpha_{IFN\beta(DC)}(DC) \right] - \beta_{IFN\beta}(IFN\beta) - k_{tr(IFN\beta)}(IFN\beta)$$

( $IFN\beta$ ) is secreted by ( $I$ ) and ( $DC$ ). ( $IFN\beta$ ) additionally has a basal non-specific production rate  $\alpha_{IFN\beta} \cdot \alpha_{IFN\beta(basal)}$ , a clearance rate  $\beta_{IFN\beta}$  and inter-compartmental transport rate  $k_{tr(IFN\beta)}$ .

## 19 Interleukin-2 (IL-2) ( $IL2$ )

$$\frac{dIL2}{dt} = \alpha_{IL2} \left[ \alpha_{IL2(basal)} + \alpha_{IL2(DC)}(DC) + \alpha_{IL2(Th1)}(Th1) \right] - \beta_{IL2}(IL2) - k_{tr(IL2)}(IL2)$$

( $IL2$ ) is secreted by ( $DC$ ) and ( $Th1$ ). ( $IL2$ ) additionally has a basal non-specific production rate  $\alpha_{IL2} \cdot \alpha_{IL2(basal)}$ , a clearance rate  $\beta_{IL2}$  and inter-compartmental transport rate  $k_{tr(IL2)}$ .

## 20 Interleukin-12 (IL-12) ( $IL12$ )

$$\frac{dIL12}{dt} = \alpha_{IL12} \left[ \alpha_{IL12(basal)} + \alpha_{IL12(DC)}(DC) + \alpha_{IL12(M1)}(M1) \right] - \beta_{IL12}(IL12) - k_{tr(IL12)}(IL12)$$

( $IL12$ ) is secreted by ( $DC$ ) and ( $M1$ ). ( $IL12$ ) additionally has a basal non-specific production rate  $\alpha_{IL12} \cdot \alpha_{IL12(basal)}$ , a clearance rate  $\beta_{IL12}$  and inter-compartmental transport rate  $k_{tr(IL12)}$ .

## 21 Interleukin-17 (IL-17) ( $IL17$ )

$$\frac{dIL17}{dt} = \alpha_{IL17} \left[ \alpha_{IL17(basal)} + \alpha_{IL17(Th17)}(Th17) + \alpha_{IL17(CTL)}(CTL) \right] - \beta_{IL17}(IL17) - k_{tr(IL17)}(IL17)$$

( $IL17$ ) is secreted by ( $CTL$ ) and ( $Th17$ ). ( $IL17$ ) additionally has a basal non-specific production rate  $\alpha_{IL17} \cdot \alpha_{IL17(basal)}$ , a clearance rate  $\beta_{IL17}$  and inter-compartmental transport rate  $k_{tr(IL17)}$ .

## 22 Interleukin-10 (IL-10) ( $IL10$ )

$$\frac{dIL10}{dt} = \alpha_{IL10} \left[ \alpha_{IL10(basal)} + \alpha_{IL10(Treg)}(Treg) \right] - \beta_{IL10}(IL10) - k_{tr(IL10)}(IL10)$$

( $IL10$ ) is secreted by ( $Treg$ ). ( $IL10$ ) additionally has a basal non-specific production rate  $\alpha_{IL10} \cdot \alpha_{IL10(basal)}$ , a clearance rate  $\beta_{IL10}$  and inter-compartmental transport rate  $k_{tr(IL10)}$ .

## 23 Transforming growth factor $\beta$ (TGF- $\beta$ ) ( $TGF\beta$ )

$$\frac{dTGF\beta}{dt} = \alpha_{TGF\beta} \left[ \alpha_{TGF\beta(basal)} + \alpha_{TGF\beta(Treg)}(Treg) + \alpha_{TGF\beta(Th17)}(Th17) \right] - \beta_{TGF\beta}(TGF\beta) - k_{tr(TGF\beta)}(TGF\beta)$$

( $TGF\beta$ ) is secreted by ( $Treg$ ) and ( $Th17$ ). ( $TGF\beta$ ) additionally has a basal non-specific production rate  $\alpha_{TGF\beta} \cdot \alpha_{TGF\beta(basal)}$ , a clearance rate  $\beta_{TGF\beta}$  and inter-compartmental transport rate  $k_{tr(TGF\beta)}$ .

## 24 Granulocyte macrophage-colony stimulating factor (GM-CSF) ( $GM-CSF$ )

$$\frac{d(GM-CSF)}{dt} = \alpha_{GM-CSF} [\alpha_{GM-CSF(basal)} + \alpha_{GM-CSF(Th1)}(Th1) + \alpha_{GM-CSF(M1)}(M1) + \alpha_{GM-CSF(Th17)}(Th17)] - \beta_{GM-CSF}(GM-CSF) - k_{tr(GM-CSF)}(GM-CSF)$$

( $GM-CSF$ ) is secreted by ( $M1$ ), ( $Th17$ ) and ( $Th1$ ). ( $GM-CSF$ ) additionally has a basal non-specific production rate  $\alpha_{GM-CSF} \cdot \alpha_{GM-CSF(basal)}$ , a clearance rate  $\beta_{GM-CSF}$  and inter-compartmental transport rate  $k_{tr(GM-CSF)}$ .

## 25 C-reactive Protein

$$\frac{dCRP_{extracellular}}{dt} = k_{CRP\_secretion} V_{m\_Prot\_synth} \cdot vol_{liver}(IL6_c) + k_{tr(CRP)} vol_{liver} - k_{deg\_CRP}(CRP_{extracellular})$$

$$\frac{dCRP_{blood}}{dt} = k_{basal\_CRP} - k_{tr(CRP)} - k_{deg\_CRP}(CRP_{blood})$$

CRP is produced in the liver ( $(CRP_{extracellular})$ ) and is induced by liver concentrations of ( $IL6$ ). ( $CRP_{extracellular}$ ) is transported to blood at an inter-compartmental transit rate  $k_{tr(CRP)}$ . ( $CRP_{blood}$ ) is also basally produced at a rate  $k_{basal\_CRP}$ . Both ( $CRP_{extracellular}$ ) and ( $CRP_{blood}$ ) are cleared at a rate  $k_{deg\_CRP}$  from their respective compartments.

## 26 Surfact Protein-D ( $SPD$ )

$$\frac{dSPD}{dt} = k_{basal\_SPD} + \alpha_{SPD(AT2)}(DAT2) + \alpha_{SPD(AT1)}(DAT1) + \alpha_{SPD(CTL\_I)} k_{kill} \left( 1 + \frac{IFN_{\beta}}{km_{kill} + IFN_{\beta}} \right) \cdot I \cdot (CTL) - k_{tr(SPD)}(SPD)$$

( $SPD$ ) is released by ( $DAT1$ ), ( $DAT2$ ) and the cytotoxic clearance of ( $I$ ) by ( $CTL$ ) in the alveolar compartment. ( $SPD$ ) has an inter-compartmental transit rate of  $k_{tr(SPD)}$ .

## 27 Ferritin ( $FER$ )

$$\frac{dFER}{dt} = k_{basal\_FER} + \alpha_{FER(AT1)}(DAT1) + \alpha_{FER(AT12)}(DAT2) + \alpha_{FER(CTL\_I)} k_{kill} \left( 1 + \frac{IFN_{\beta}}{km_{kill} + IFN_{\beta}} \right) \cdot I \cdot (CTL) - k_{tr(FER)}(FER)$$

( $FER$ ) is released by ( $DAT1$ ), ( $DAT2$ ) and the cytotoxic clearance of ( $I$ ) by ( $CTL$ ) in the alveolar compartment. ( $FER$ ) has an inter-compartmental transit rate of  $k_{tr(FER)}$ .

## 28 Immune Cell Transport

$$\frac{dIC_c}{dt} = tr_{IC}(IC) \left( \frac{vol_{alv}}{vol_{plasma}} \right) - \beta_{IC_c}(IC_c)$$

$$tr_{IC} = k_{tr\_IC} \left( \frac{IC}{vol_{alv}} - IC_c \right)$$

## 29 Cytokine Transport

$$\frac{dCytokine_c}{dt} = \frac{tr_{cytokine}}{vol_{plasma}} - \beta_{cytokine_c}(Cytokine_c)$$

$$tr_{cytokine} = k_{tr\_cytokine}(Cytokine)$$

## 30 Biomarker Transport

$$\frac{dSPD\_c}{dt} = k_{tr\_SPD}(SPD) - \beta_{SPD_c}(SPD\_c)$$

$$\frac{dFER\_c}{dt} = k_{tr\_FER}(FER) - \beta_{FER_c}(FER\_c)$$
