# Supplementary material
Source: PubMed Central journal article supplement (PMC7825191)

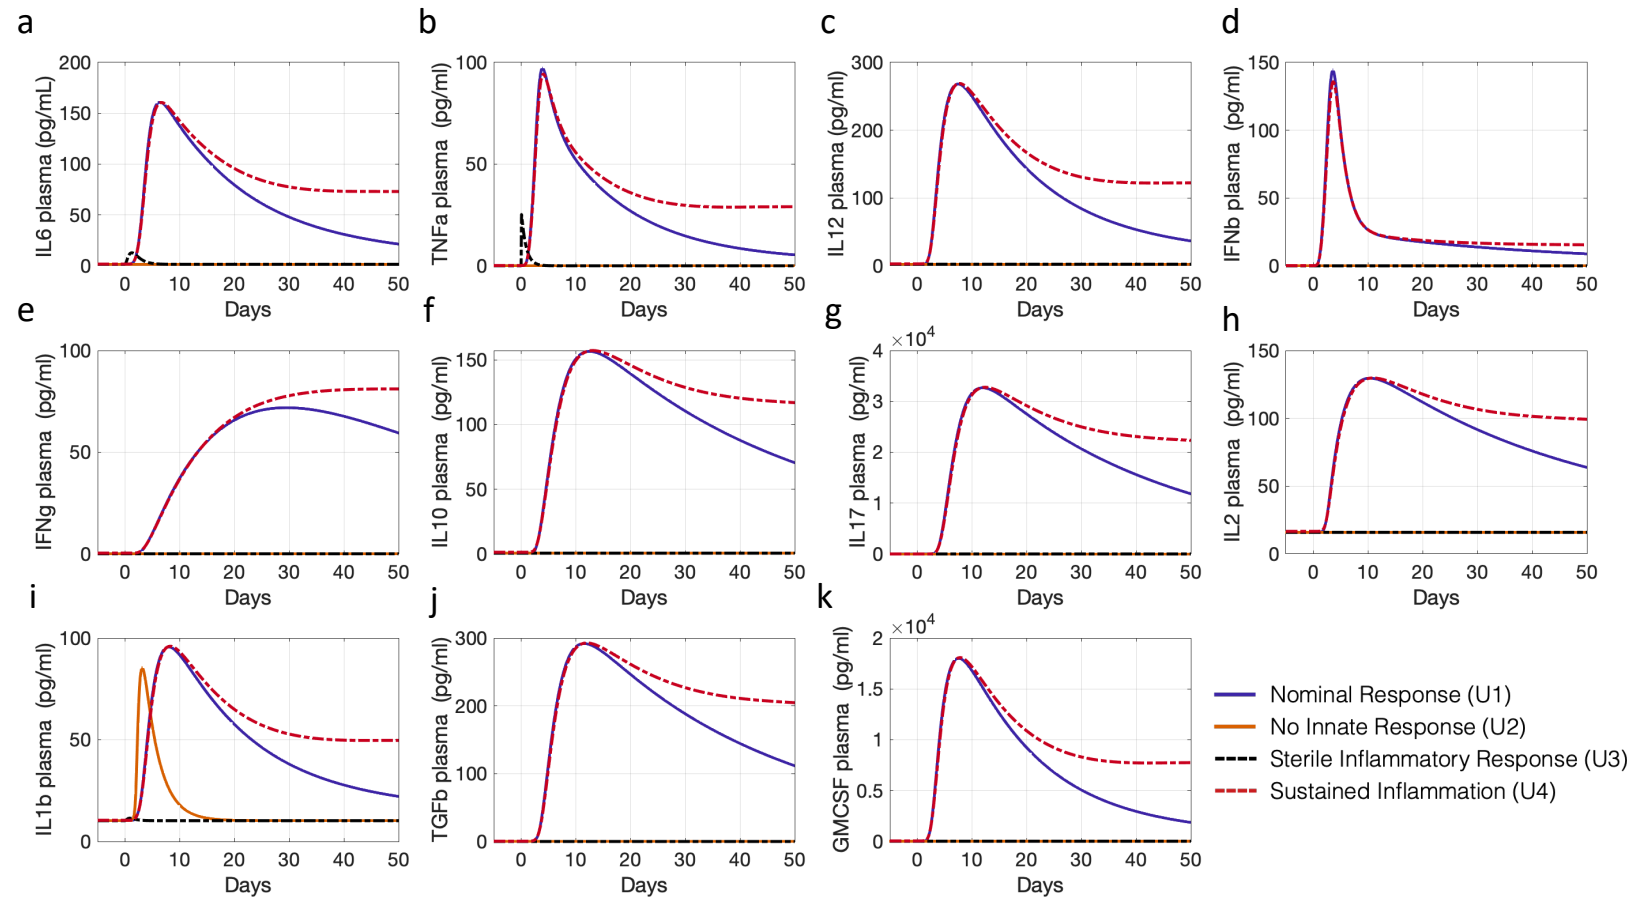

Figure S2: Model Output of Plasma Cytokine Time-Course for Unit Tests.

Supplement: PSP4-10-18-s002.pdf [file PSP4-10-18-s002.pdf]

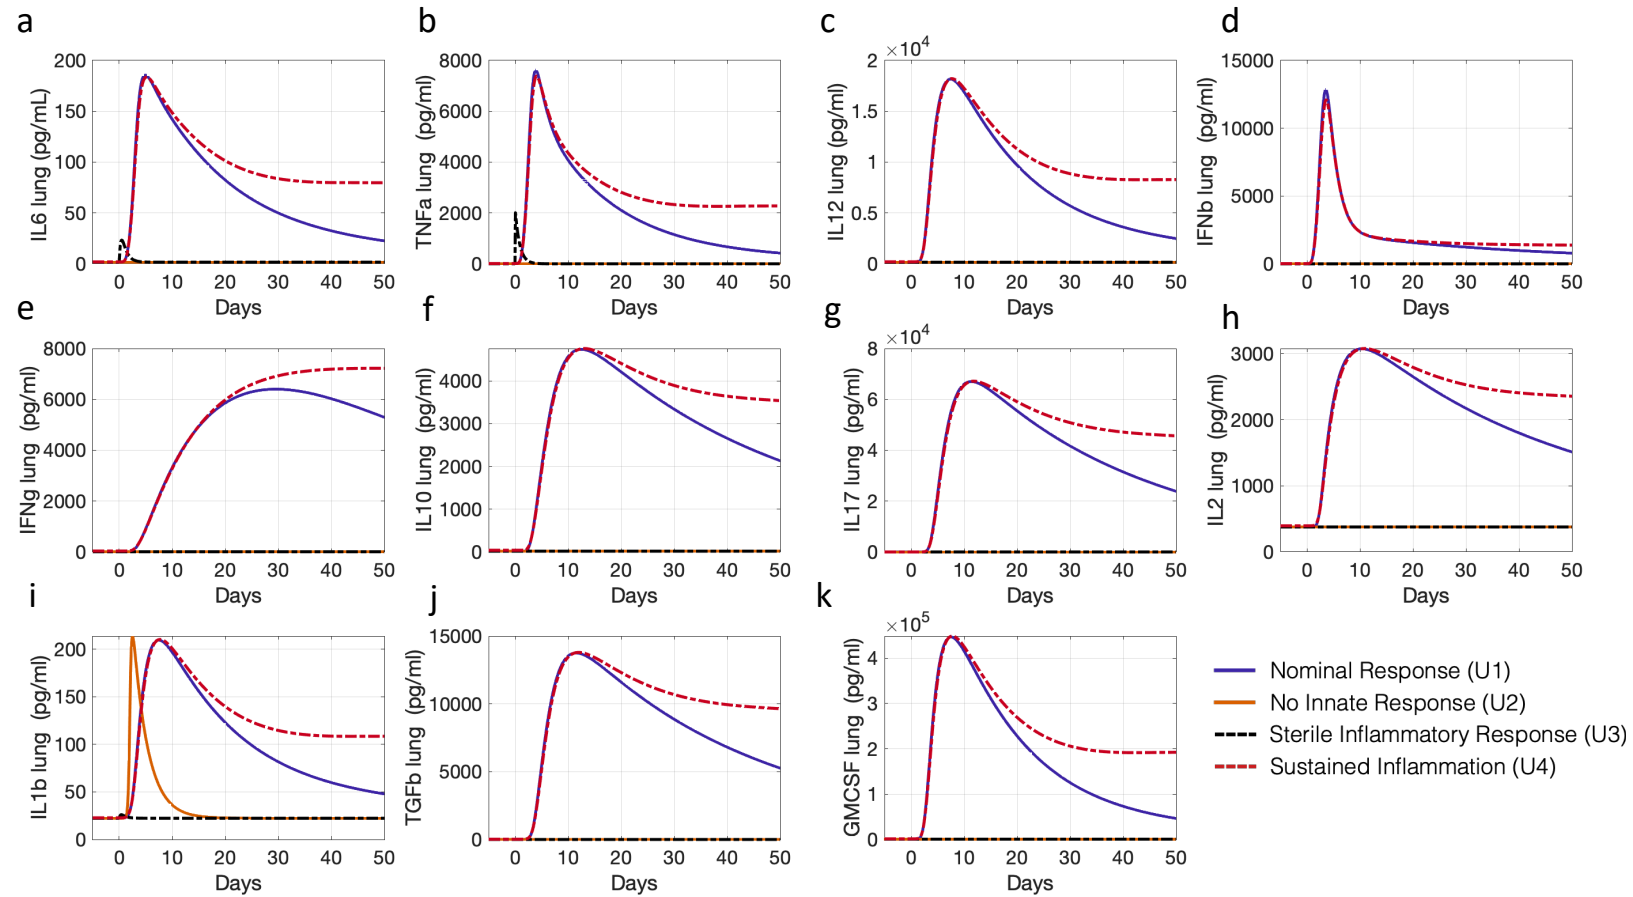

Figure S3: Model Output of Lung Cytokine Time-Course for Unit Tests.

Supplement: PSP4-10-18-s003.pdf [file PSP4-10-18-s003.pdf]

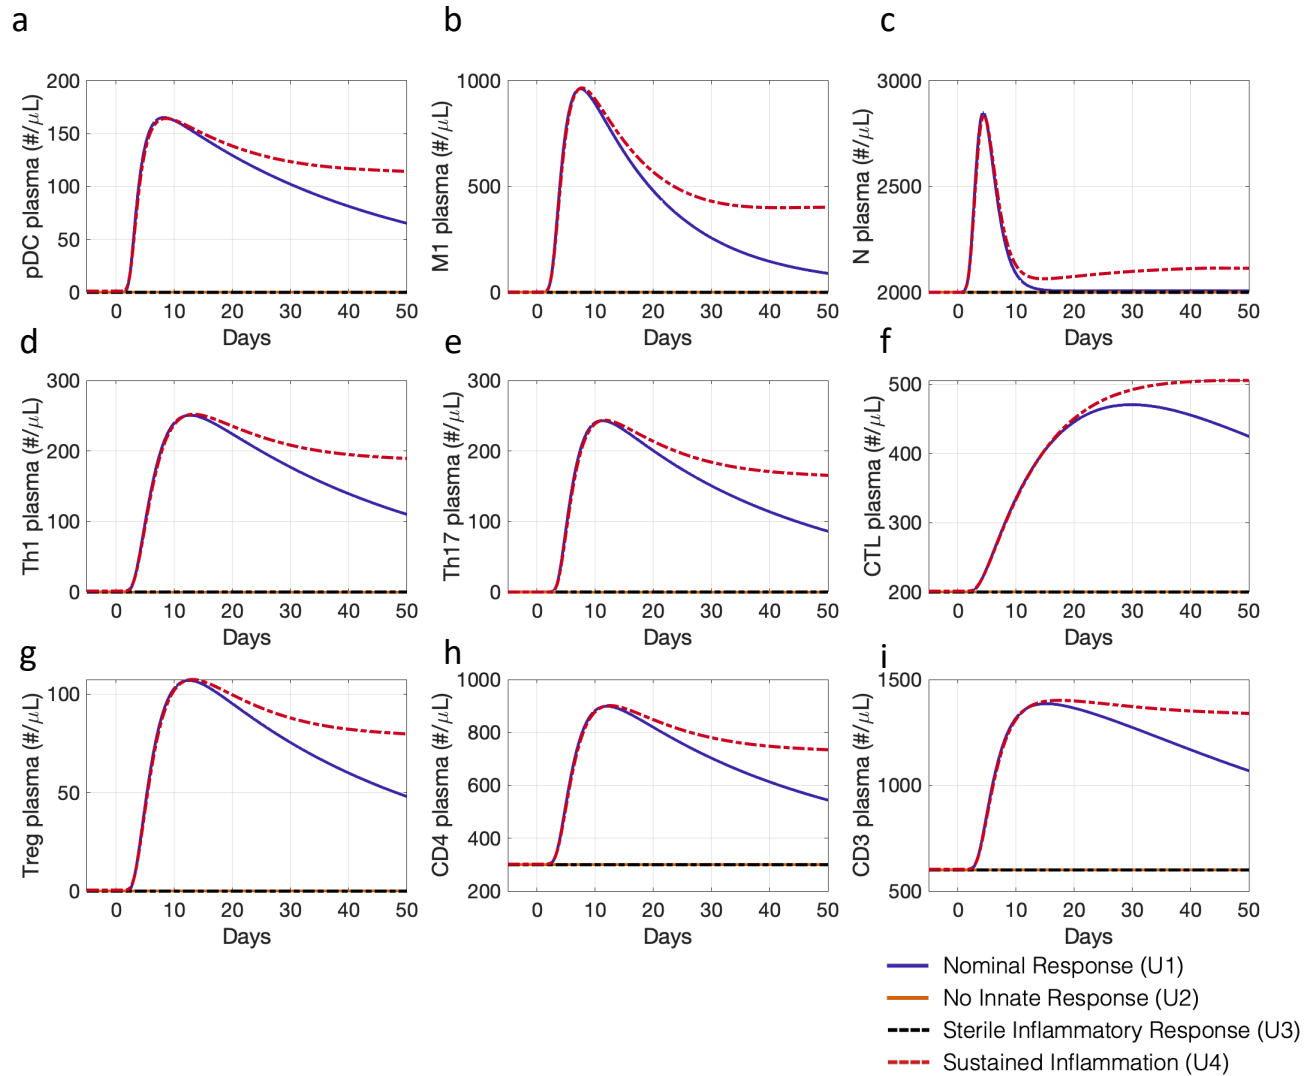

Figure S4: Model Output of Plasma Immune Cell Time-Course for Unit Tests.

Supplement: PSP4-10-18-s004.pdf [file PSP4-10-18-s004.pdf]

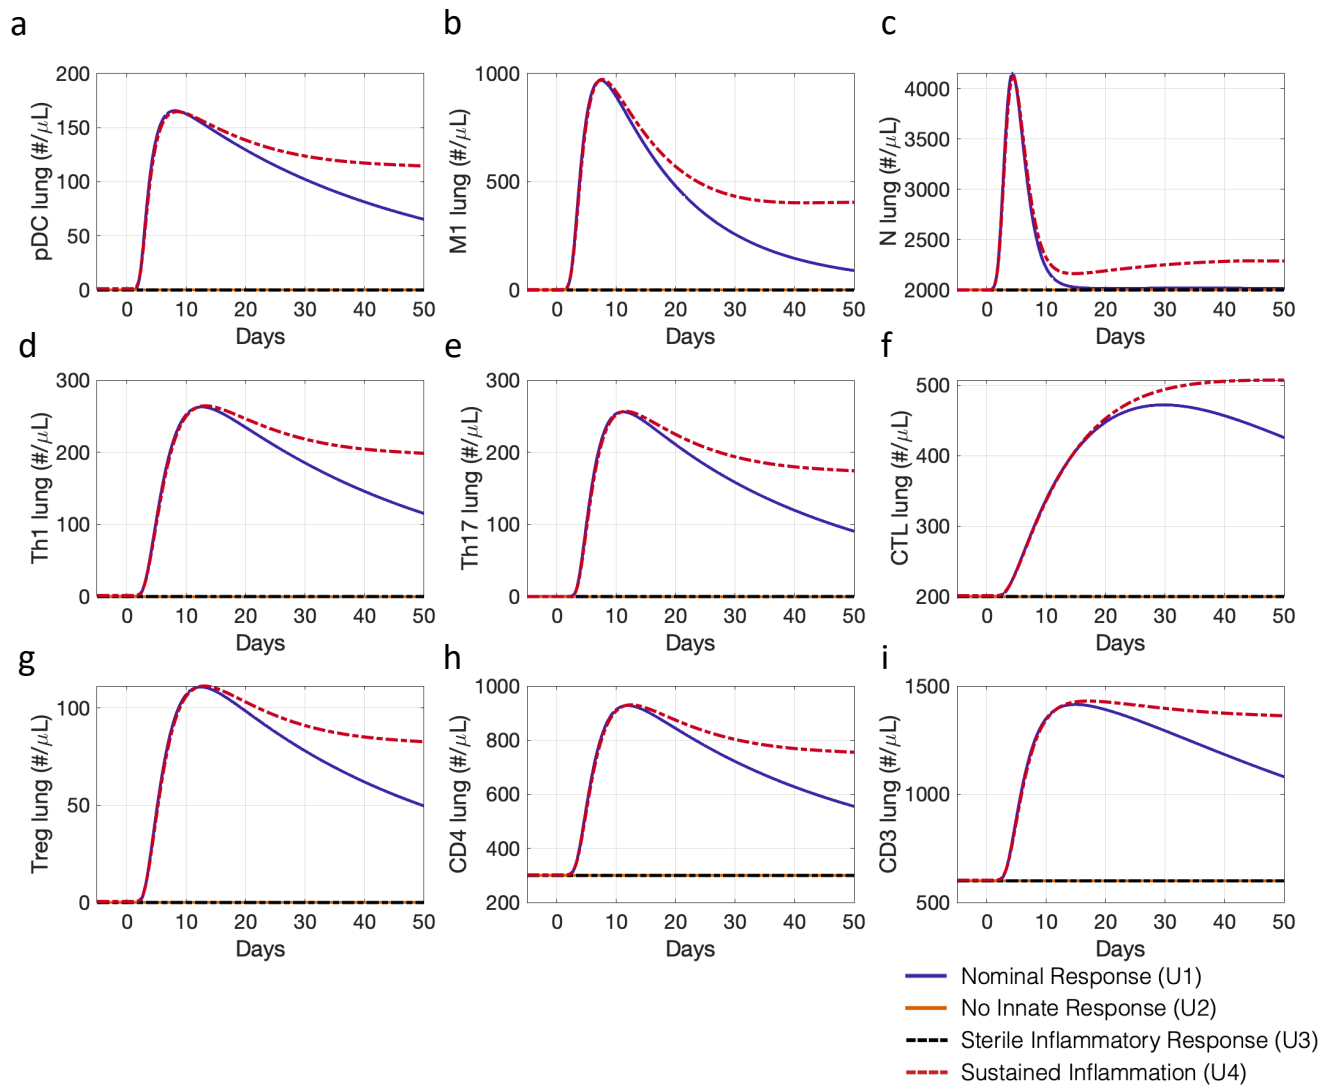

Figure S5: Model Output of Lung Immune Cell Time-Course for Unit Tests.

Supplement: PSP4-10-18-s005.pdf [file PSP4-10-18-s005.pdf]
